# Supplementary material for: Latent Class Analysis of Noninvasive Methods and Liver Biopsy in Chronic Hepatitis C: An Approach without a Gold Standard
Source: Hindawi journal article supplement (doi:10.1155/2017/8252980), 2017-01-01

## SUPPLEMENTARY MATERIAL

### **Latent Class Analysis of non-invasive methods and liver biopsy in chronic hepatitis C: an approach without a gold standard**

#### **Supplementary Tables**

**Supplementary Table 1.** Performance of tests as estimated by classical 2 x 2 analysis (liver biopsy as gold standard) and Latent Class Analysis (without gold standard) using APRI's cut-off  $> 0.5$  and  $> 1.0$  for diagnosis of significant fibrosis ( $F \geq 2$ ) and cirrhosis ( $F=4$ ), respectively

**Supplementary Table 2.** Sensitivities and specificities of tests for diagnosis of significant fibrosis ( $F \geq 2$ ) and cirrhosis ( $F=4$ ) as estimated by Latent Class Analysis in models with co-linearity between non-invasive methods

**Supplementary Table 3.** Diagnostic performance of non-invasive tests for diagnosis of significant fibrosis ( $F \geq 2$ ) and cirrhosis ( $F=4$ ) in obese patients ( $BMI \geq 30 \text{Kg/m}^2$ ) ( $n=30$ )

#### **Supplementary Figures**

**Supplementary Figure 1.** Area under the ROC curve (AUROC) for diagnosis of significant fibrosis ( $F \geq 2$ ) of (A) transient elastography (TE), (B) Aspartate-to-Platelet-Ratio-Index (APRI) and (C) Enhanced Liver Fibrosis (ELF) using liver biopsy as the reference

**Supplementary Figure 2.** Area under the ROC curve (AUROC) for diagnosis of cirrhosis ( $F=4$ ) of (A) transient elastography (TE), (B) Aspartate-to-Platelet-Ratio-Index (APRI) and (C) Enhanced Liver Fibrosis (ELF) using liver biopsy as the reference

**Supplementary Table 1.** Performance of tests as estimated by classical 2 x 2 analysis (liver biopsy as gold standard) and Latent Class Analysis (without gold standard) using APRI's cut-off  $> 0.5$  and  $> 1.0$  for diagnosis of significant fibrosis ( $F \geq 2$ ) and cirrhosis ( $F=4$ ), respectively.

|                                                     | Sensitivity<br>(95% CI) |                     | Specificity<br>(95% CI) |
|-----------------------------------------------------|-------------------------|---------------------|-------------------------|
|                                                     | <u>Classical 2 x 2</u>  | <u>LCA</u>          | <u>Classical 2 x 2</u>  |
| <b>Significant fibrosis (<math>F \geq 2</math>)</b> |                         |                     |                         |
| <b>TE</b>                                           | 0.87<br>(0.78-0.96)     | 0.92<br>(0.87-0.97) | 0.71<br>(0.60-0.82)     |
| <b>APRI</b>                                         | 0.93<br>(0.86-0.99)     | 0.97<br>(0.95-0.99) | 0.59<br>(0.50-0.68)     |
| <b>ELF</b>                                          | 0.78<br>(0.67-0.89)     | 0.81<br>(0.75-0.87) | 0.73<br>(0.62-0.84)     |
| <b>Liver biopsy</b>                                 | 1.00*                   | 0.89<br>(0.83-0.95) | 1.00*                   |
| <b>Cirrhosis (<math>F=4</math>)</b>                 |                         |                     |                         |
| <b>TE</b>                                           | 1.00                    | 0.95<br>(0.84-0.99) | 0.80<br>(0.71-0.89)     |
| <b>APRI</b>                                         | 0.71<br>(0.40-0.99)     | 0.81<br>(0.73-0.89) | 0.63<br>(0.54-0.72)     |
| <b>ELF</b>                                          | 0.88<br>(0.68-1.00)     | 0.93<br>(0.87-0.99) | 0.73<br>(0.64-0.82)     |
| <b>Liver biopsy</b>                                 | 1.00*                   | 0.30<br>(0.21-0.39) | 1.00*                   |

\* gold standard by definition. 2LC, two latent class; TE, transient elastography; APRI, aspartate-to-platelet ratio; ELF, enhanced liver fibrosis; CI, confidence interval; LCA, Latent Class Analysis; LR, likelihood ratio; Positive LR was calculated by classical analysis using liver biopsy as gold standard. Models that data better fitted (2LC) for diagnosis of significant fibrosis [ $L^2$  of 4.5757 (p value = 0.5993) / Bayesian information criteria = -23.9974] and cirrhosis [ $L^2$  of 7.1380 (p value = 0.3083) / Bayesian information criteria = -21.4351] were considered for Latent Class Analysis

**Supplementary Table 2.** Diagnostic performance of non-invasive tests for diagnosis of significant fibrosis (F $\geq$ 2) and cirrhosis (F=4) in obese patients (BMI  $\geq$  30Kg/m<sup>2</sup>) (n=30)

|                                                   | <b>AUROC (95%CI)</b> | <b>Sensitivity (95%CI)</b> | <b>Specificity (95% CI)</b> | <b>PPV</b> | <b>NPV</b> |
|---------------------------------------------------|----------------------|----------------------------|-----------------------------|------------|------------|
| <b>Significant fibrosis (F<math>\geq</math>2)</b> |                      |                            |                             |            |            |
| <b>TE</b>                                         | 0.888 (0.773-0.999)  | 0.94 (0.82-1.00)           | 0.57 (0.31-0.83)            | 0.71       | 0.89       |
| <b>APRI</b>                                       | 0.875 (0.747-0.999)  | 0.63 (0.39-0.86)           | 0.93 (0.79-1.00)            | 0.91       | 0.68       |
| <b>ELF</b>                                        | 0.790 (0.603-0.977)  | 0.88 (0.71-1.00)           | 0.64 (0.39-0.89)            | 0.74       | 0.82       |
| <b>Cirrhosis (F=4)</b>                            |                      |                            |                             |            |            |
| <b>TE</b>                                         | 0.741 (0.556-0.926)  | 0.97 (0.77-1.00)           | 0.63 (0.45-0.82)            | 0.23       | 0.99       |
| <b>APRI</b>                                       | 0.698 (0.315-0.999)  | 0.33 (0.10-0.87)           | 0.81 (0.67-0.87)            | 0.17       | 0.92       |
| <b>ELF</b>                                        | 0.543 (0.100-0.999)  | 0.67 (0.13-1.00)           | 0.48 (0.29-0.67)            | 0.13       | 0.93       |

AUROC, area under the receiver operator curve; PPV, positive predictive value; negative predictive value; TE, transient elastography; APRI, aspartate-to-platelet ratio; ELF, enhanced liver fibrosis; CI,

**Supplementary Table 3.** Sensitivities and specificities of tests for diagnosis of significant fibrosis ( $F \geq 2$ ) and cirrhosis ( $F=4$ ) as estimated by Latent Class Analysis in models with co-linearity between non-invasive methods

| <b>Model</b>                                        | <b>2LC with direct effect<br/>between TE and APRI<br/>[Sensitivity/Specificity]</b> | <b>2LC with direct effect<br/>between TE and ELF<br/>[Sensitivity/Specificity]</b> | <b>2LC with direct effect<br/>between APRI and<br/>ELF<br/>[Sensitivity/Specificity]</b> |
|-----------------------------------------------------|-------------------------------------------------------------------------------------|------------------------------------------------------------------------------------|------------------------------------------------------------------------------------------|
| <b>Significant fibrosis (<math>F \geq 2</math>)</b> |                                                                                     |                                                                                    |                                                                                          |
| <b>TE</b>                                           | 0.92 / 0.75                                                                         | 0.93 / 0.82                                                                        | 0.94 / 0.81                                                                              |
| <b>APRI</b>                                         | 0.46 / 0.96                                                                         | 0.46 / 1.00                                                                        | 0.46 / 0.98                                                                              |
| <b>ELF</b>                                          | 0.84 / 0.78                                                                         | 0.82 / 0.82                                                                        | 0.79 / 0.77                                                                              |
| <b>Liver biopsy</b>                                 | 0.91 / 0.91                                                                         | 0.82 / 0.91                                                                        | 0.86 / 0.92                                                                              |
| <b>Cirrhosis (<math>F=4</math>)</b>                 |                                                                                     |                                                                                    |                                                                                          |
| <b>TE</b>                                           | 0.94 / 0.94                                                                         | 0.92 / 0.95                                                                        | 1.00 / 0.97                                                                              |
| <b>APRI</b>                                         | 0.59 / 0.97                                                                         | 0.56 / 0.97                                                                        | 0.51 / 0.96                                                                              |
| <b>ELF</b>                                          | 0.94 / 0.88                                                                         | 0.95 / 0.89                                                                        | 0.87 / 0.86                                                                              |
| <b>Liver biopsy</b>                                 | 0.30 / 1.00                                                                         | 0.29 / 1.00                                                                        | 0.29 / 1.00                                                                              |

2LC, two latent classes; TE, transient elastography; APRI, aspartate-to-platelet ratio; ELF, enhanced liver fibrosis

**Supplementary Figure 1.** Area under the ROC curve (AUROC) for diagnosis of significant fibrosis ( $F \geq 2$ ) of (A) transient elastography (TE), (B) Aspartate-to-Platelet-Ratio-Index (APRI) and (C) Enhanced Liver Fibrosis (ELF) using liver biopsy as the reference

**A**

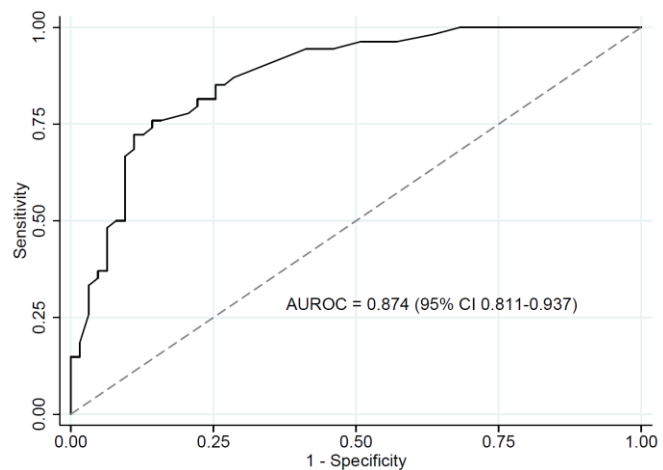

**B**

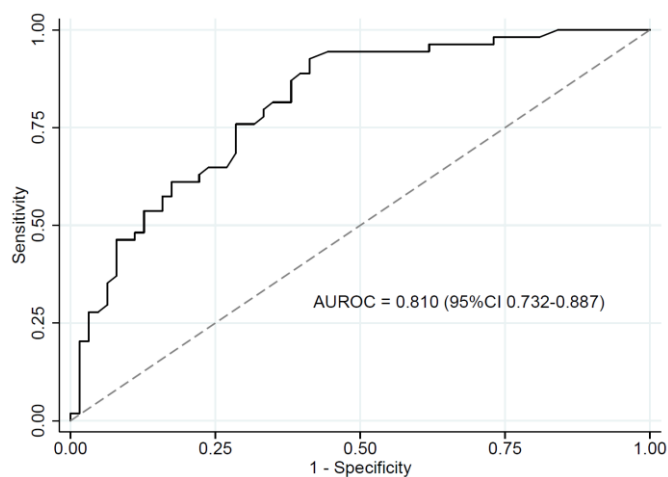

**C**

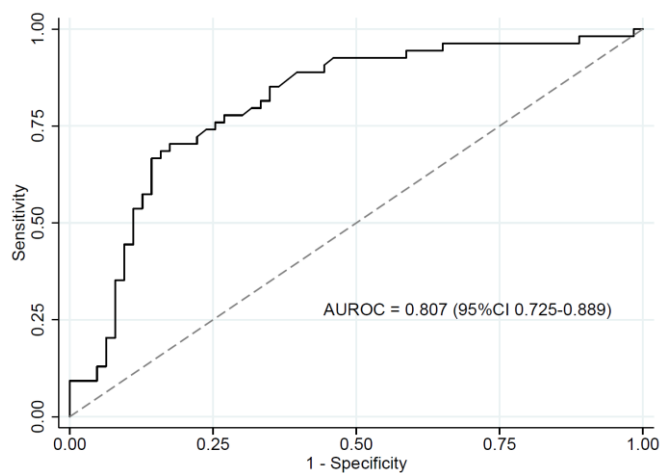

**Supplementary Figure 2.** Area under the ROC curve (AUROC) for diagnosis of cirrhosis (F=4) of (A) transient elastography (TE), (B) Aspartate-to-Platelet-Ratio-Index (APRI) and (C) Enhanced Liver Fibrosis (ELF) using liver biopsy as the reference

A

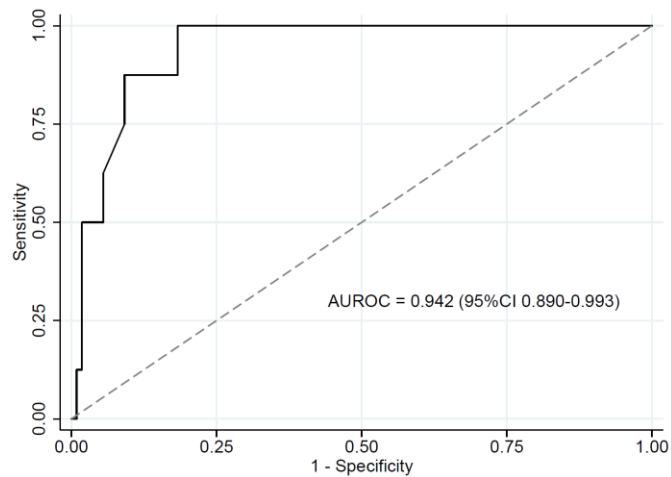

B

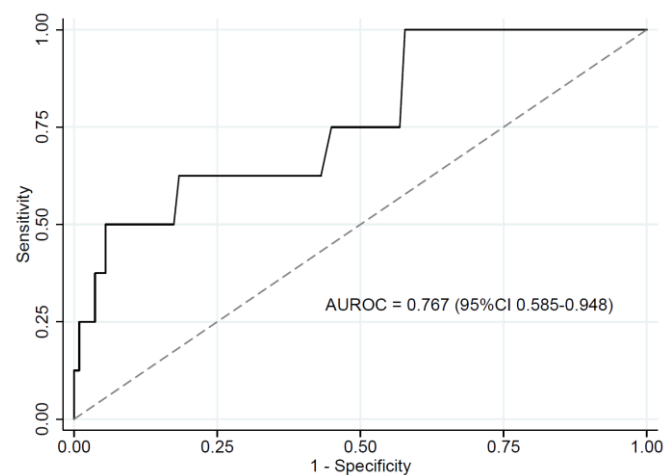

C

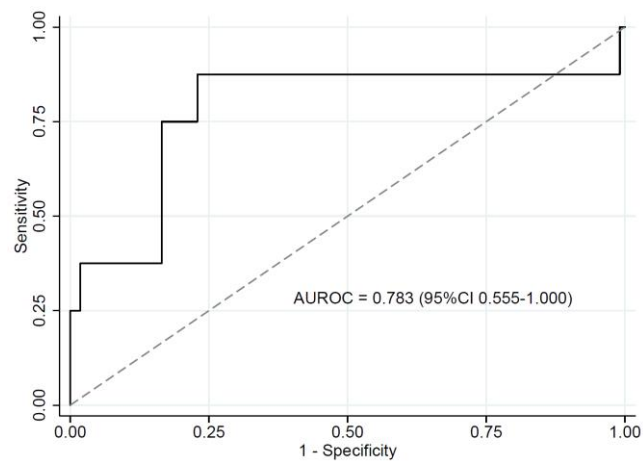

Supplement: f1 [file 8252980.f1.pdf]
